# Supplementary material
Source: PubMed Central journal article supplement (PMC123015)

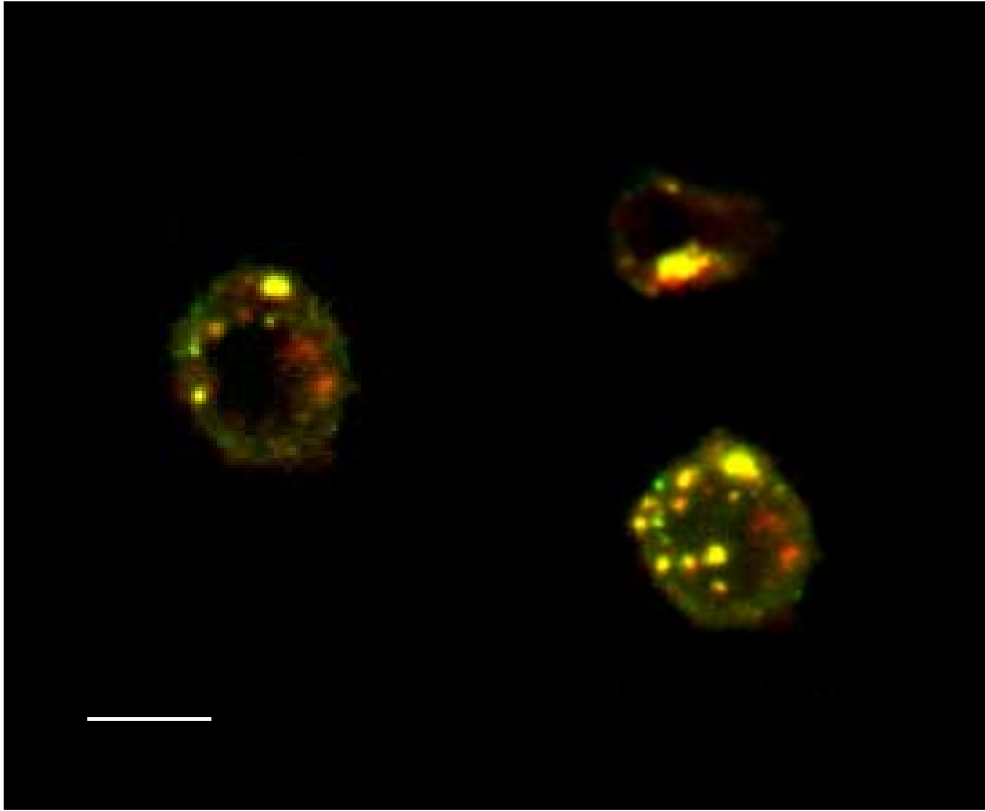

Supplement: pnas_99_12_8031__3.pdf [file pnas_99_12_8031__3.pdf]

**A**

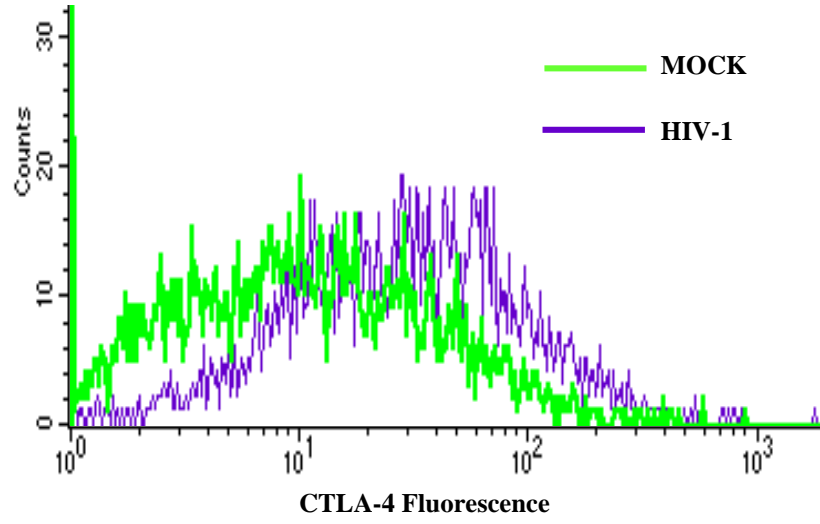

**B**

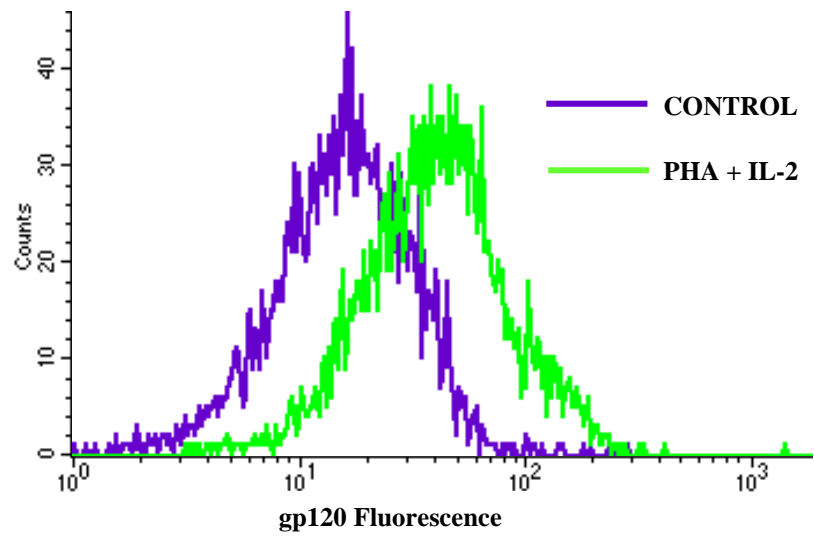

Supplement: pnas_99_12_8031__4.pdf [file pnas_99_12_8031__4.pdf]
